# Supplementary material for: Lactobacillus plantarum Generate Electricity through Flavin Mononucleotide-Mediated Extracellular Electron Transfer to Upregulate Epithelial Type I Collagen Expression and Thereby Promote Microbial Adhesion to Intestine
Source: MDPI journal article supplement (doi:10.3390/biomedicines11030677), 2023-02-23
Supplement: s1 [file s1]

# ***Lactobacillus plantarum* Generate Electricity Through Flavin Mononucleotide-Mediated Extracellular Electron Transfer to Upregulate Epithelial Type I Collagen Expression and thereby Promote Microbial Adhesion to Intestine**

Binderiya Ganzorig<sup>1</sup>, Enkhbat Zayabaatar<sup>1</sup>, Minh Tan Pham<sup>2</sup>, Shinta Marito<sup>1</sup>, Chun-Ming Huang<sup>1</sup>, Yu-Hsiang Lee<sup>1,3,\*</sup>

<sup>1</sup> Department of Biomedical Sciences and Engineering, National Central University, Taoyuan City 320317, Taiwan R.O.C.

<sup>2</sup> Faculty of Applied Sciences, Ton Duc Thang University, Ho Chi Minh City 700000, Vietnam

<sup>3</sup> Department of Chemical and Materials Engineering, National Central University, Taoyuan City 320317, Taiwan R.O.C.

\* Correspondence: Department of Biomedical Sciences and Engineering, National Central University. No. 300 Jhongda Rd., Taoyuan City 320317, Taiwan R.O.C. Telephone: (+886)-3-422-7151 Ext# 27755; Fax: (+886)-3-425-3427; E-mail: [yuhsianl@ncu.edu.tw](mailto:yuhsianl@ncu.edu.tw)

## ■ Supplementary Materials

### **S1. Result of 16sRNA sequence of *L. plantarum* MA**

GTCCATGCGGCGTGCTATACGTGCAAGTCGAACGAACTCTGGTATTGATTGGTGCT  
TGCATCATGATTTACATTTGAGTGAGTGGCGAACTGGTGAGTAACACGTGGGAAAC  
CTGCCCAGAAGCGGGGGATAACACCTGGAAACAGATGCTAATACCGCATAACAAC  
TTGGACCGCATGGTCCGAGTTTGAAAGATGGCTTCGGCTATCACTTTTGGATGGTC  
CCGCGGCGTATTAGCTAGATGGTGGGGTAACGGCTCACCATGGCAATGATACGTAG  
CCGACCTGAGAGGGTAATCGGCCACATTGGGACTGAGACACGGCCCAAACCTCCTA  
CGGGAGGCAGCAGTAGGGAATCTTCCACAATGGACGAAAGTCTGATGGAGCAAC  
GCCGCGTGAGTGAAGAAGGGTTTCGGCTCGTAAAACTCTGTTGTAAAGAAGAAC  
ATATCTGAGAGTAACTGTTTCAGGTATTGACGGTATTTAACCAGAAAGCCACGGCTA  
ACTACGTGCCAGCAGCGGCGGTAATGA
